# Supplementary material
Source: MDPI journal article supplement (https://www.mdpi.com/2410-3888/9/4/120)

Figure S1a

1cctgttgaaaatgtctgtgtaatgtagataaatgtgagggatTTTTctctctaaacccgtctcctgttcgctaaatctcacttctccaaaa  
91cgagcctgcgcaatggaacaaagtgggaatattgagatgtgatattgcccgcatctcatcctctttctccccgttttttaatgacttcaa  
1 M S S A L S S Q W H L C D A F  
181 acaagttgattttcgcggggtttgtcttgcggggacccgtgggg**ATG**CTAGCGCTCTTTCCTCTCAGTGGCATTATGTGATGCCTTC  
16 K S I M G C I S C S H T L S L L L C V L T L T P T A T G S D  
271 AAGAGCATCATGGGCTGTATCTCCTGTAGCCACACCCTCTCACTGCTGCTGTGCGTCCTCACCTGACTCCGACGGCAACGGGCTCCGAC  
46 G D R L R P T Q S P E T L C G A E L V D T L Q F V C G E R G  
361 GCGACAGGCTCCGCCCCACACAGAGTCCAGAGACCCTGTGCGGGGCGGAGCTGGTCGACACGCTGCAGTTTGTGTGTGGAGAAAAGAGGC  
76 F Y F S K P T G Y G P N A R R S R G I V D E C C F Q S C E I  
451 TTTTATTTTTCAGTAAACCCACAGGCTATGGCCCCAATGCACGGCGGTACAGTGGCATTGTGGACGAGTGCTGCTTCCAAAGCTGTGAGCTG  
106 R R L E M Y C A P A K T N K P T R S V R A Q R H T D T P R T  
541 CGGCGCCTGGAGATGTACTGTGCACCTGCCAAGACTAACAAGCCAACTCGCTCTGTGCGTGCACAGCGCCACACAGACACGCCGAGAACA  
136 T K R P L P G H S H S S F K E V H Q K N S S R G N T G G R N  
631 ACTAAGAGACCTTTACCTGGACACAGTCATTCATCCTTCAAGGAAGTGCACCAGAAAACTCAAGTCGAGGCAACACAGGGGGAAGAAAT  
166 Y R M \*  
721 TACAGAATG**TAG**ggatggagcgaatggacaaatgcccgagcggcatgggaagaaagagggcagtggccttactcggtgcccctgtggaatg  
811 gtccactgtaaaacaaaccggaggatgctaacagtggtctgacaagctcttcaaaacgatttaaacctgacaagttaagtgggtgtttaag  
901 ggtttgataagggatcttgtgattatTTTataactgcaccattccatctcgggaggaatactttgttcatgaaatctaacagactagtt  
991 tagctgctgagacacaaacaggaggctattacacctccatgtgtgagctgcagcatccccctggctccaggaaaggtgggaatggatctgg  
1081 gcttcagccagtcacagagcggcagactgtgtctgagaataagtgggtgcatcctgtccccctgaactctgtggagggtaaaaaaaaaaaaaa  
1171 aaaaaaaaaaaaaa

Figure S1b

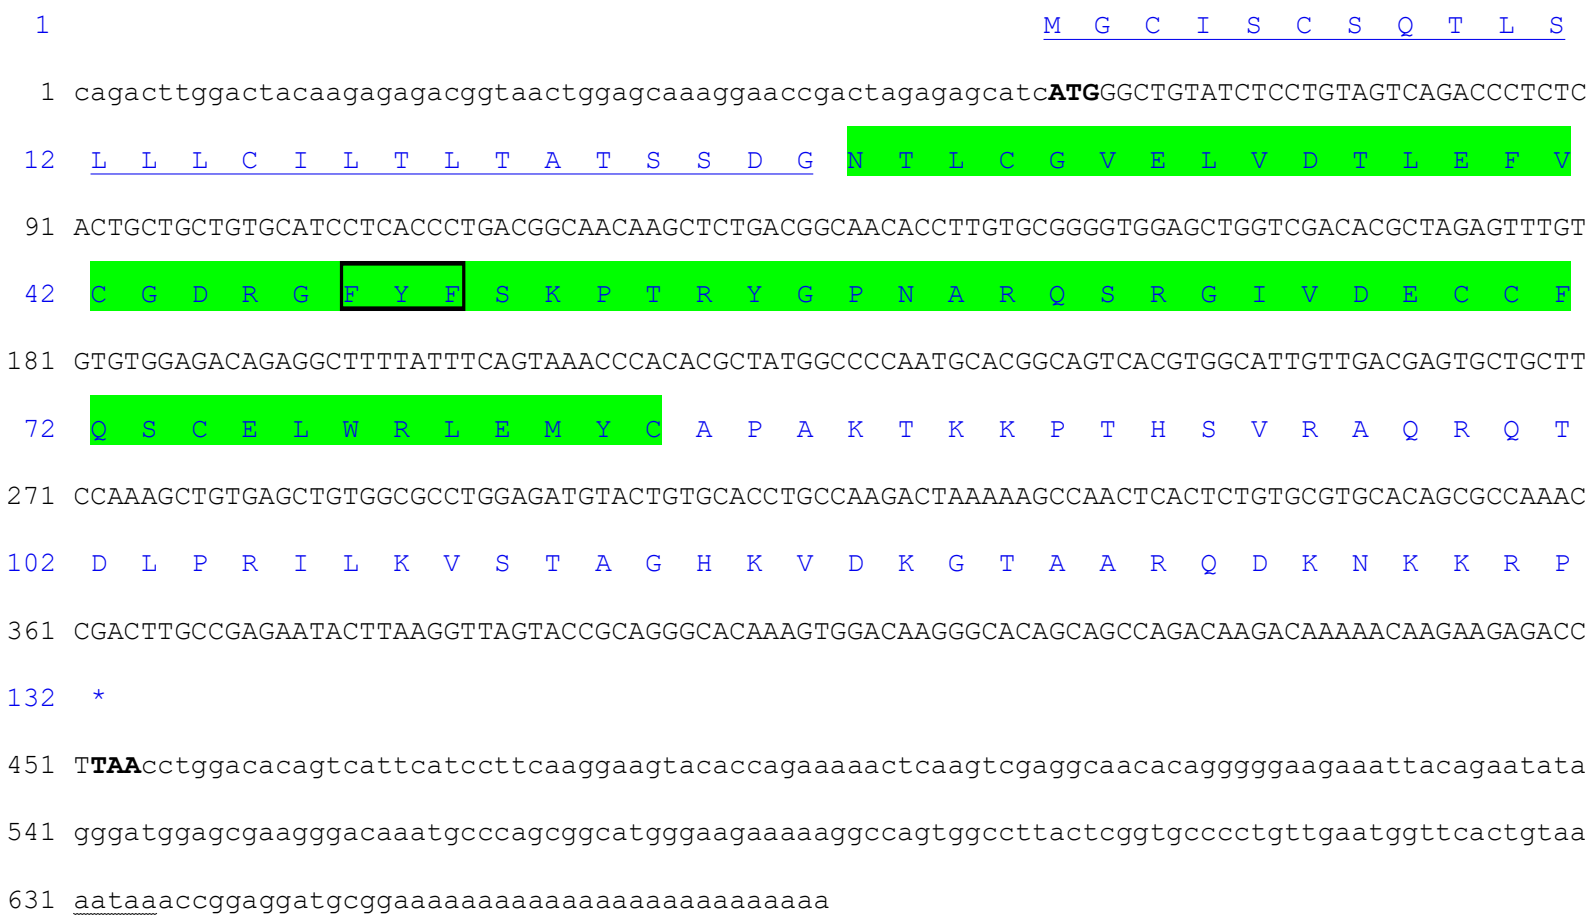

Figure S1c

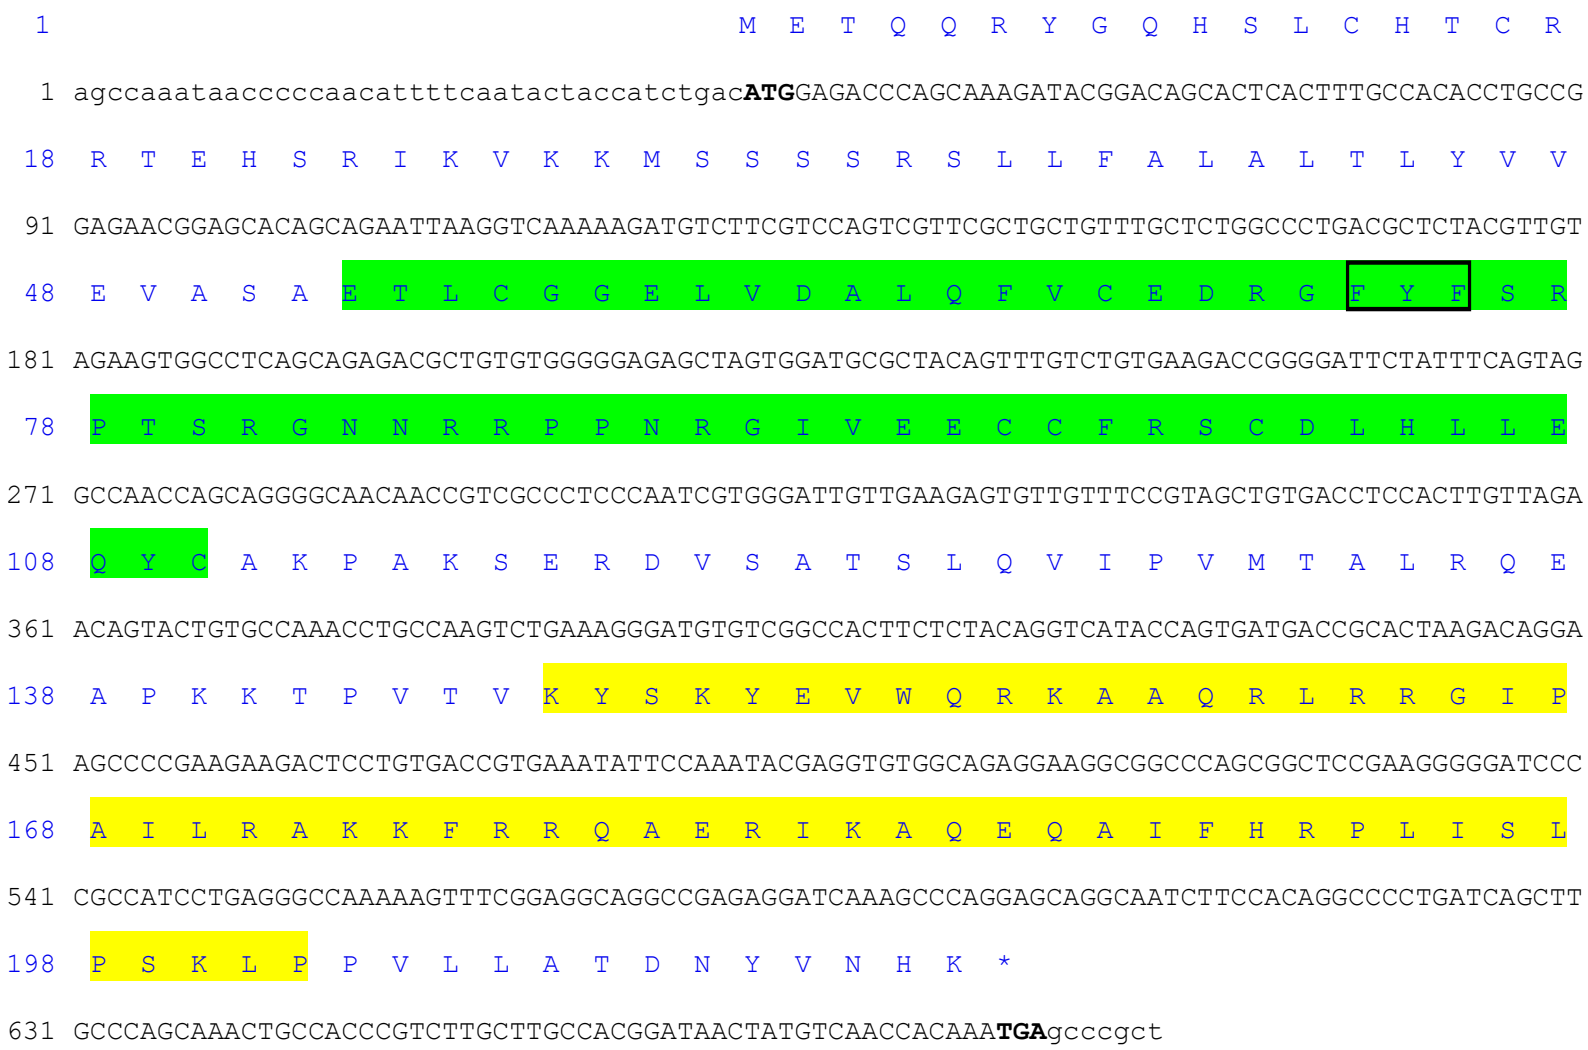

Figure S2a

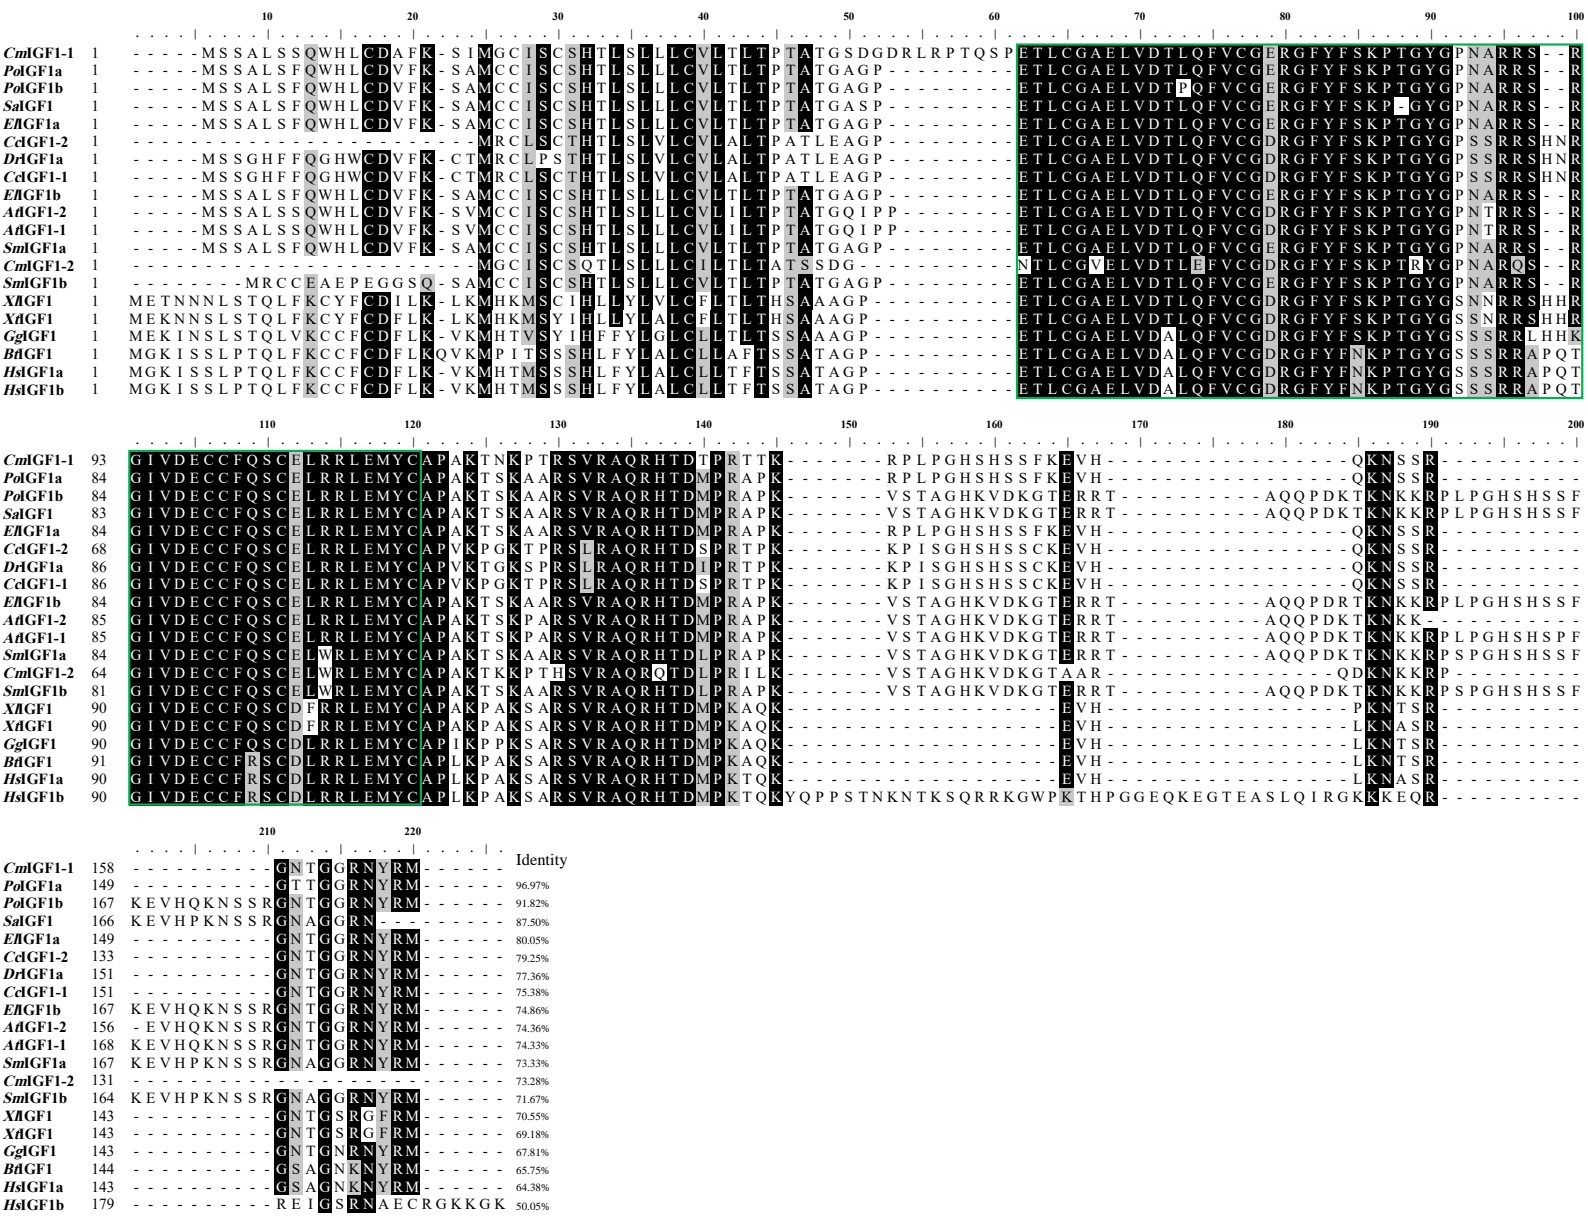

Figure S2b

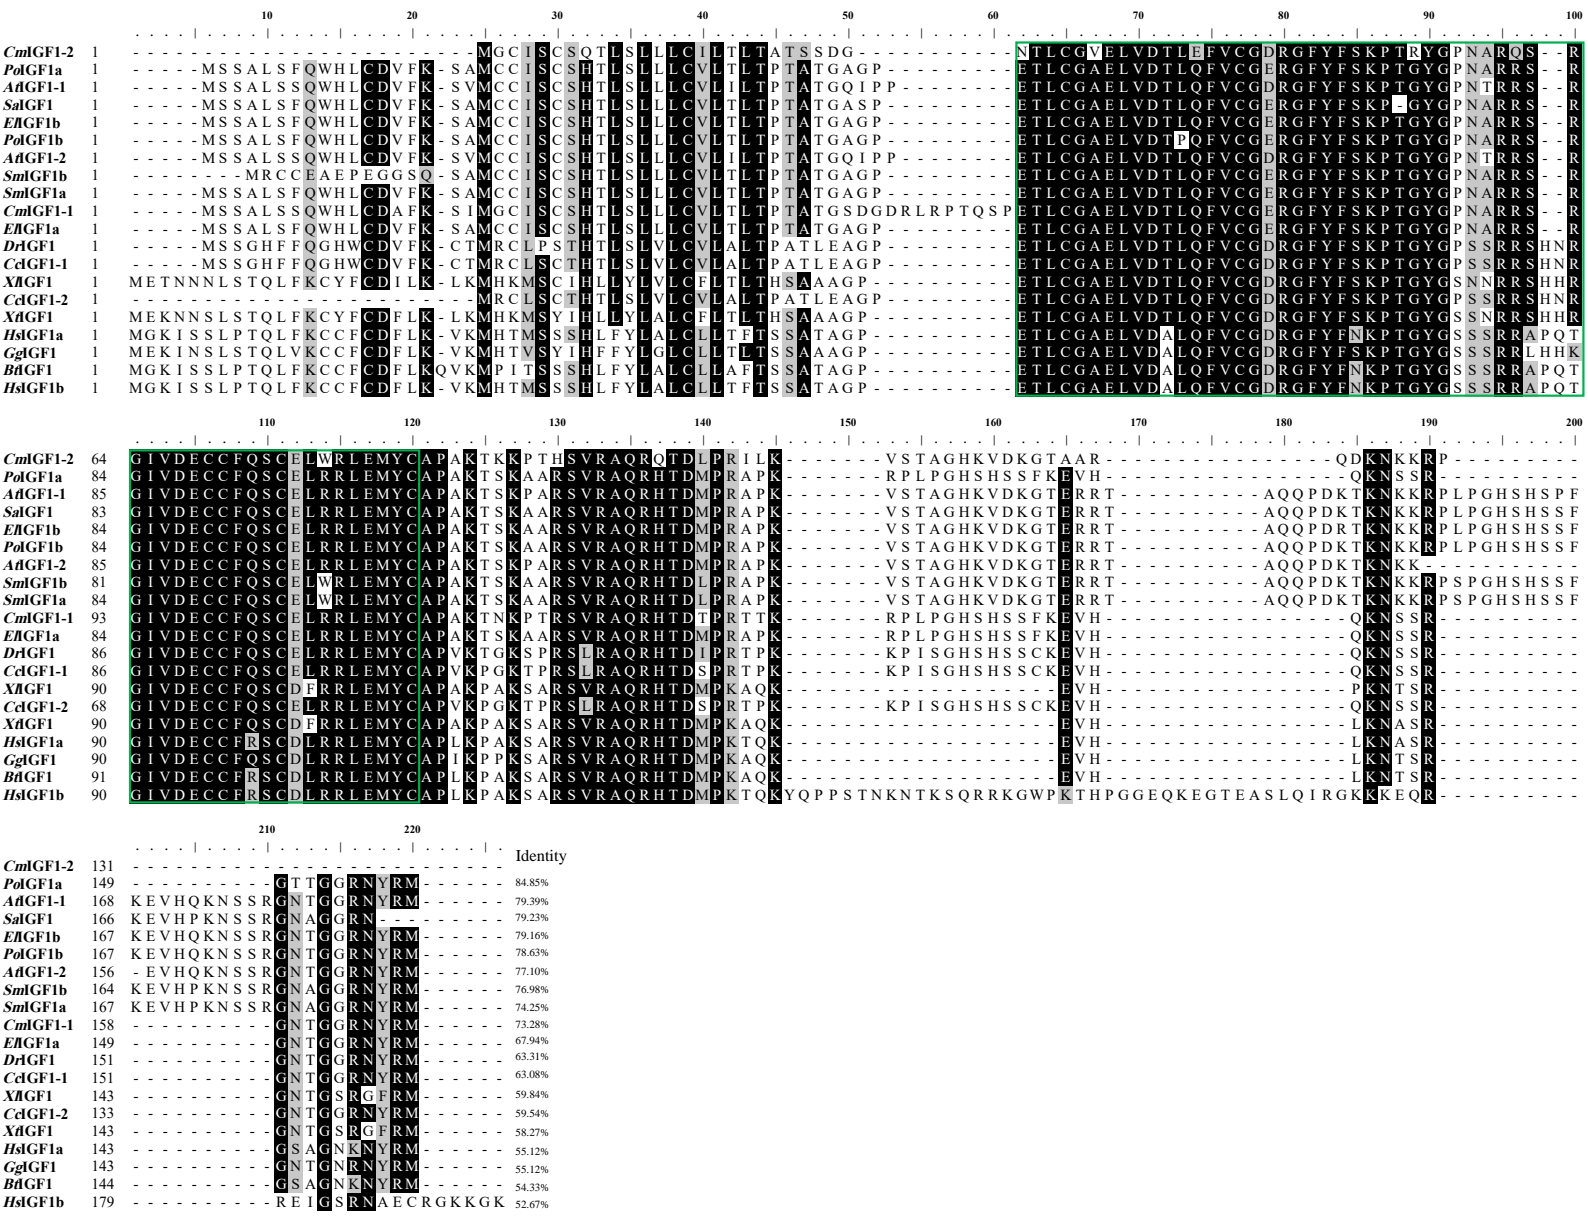

Figure S2c

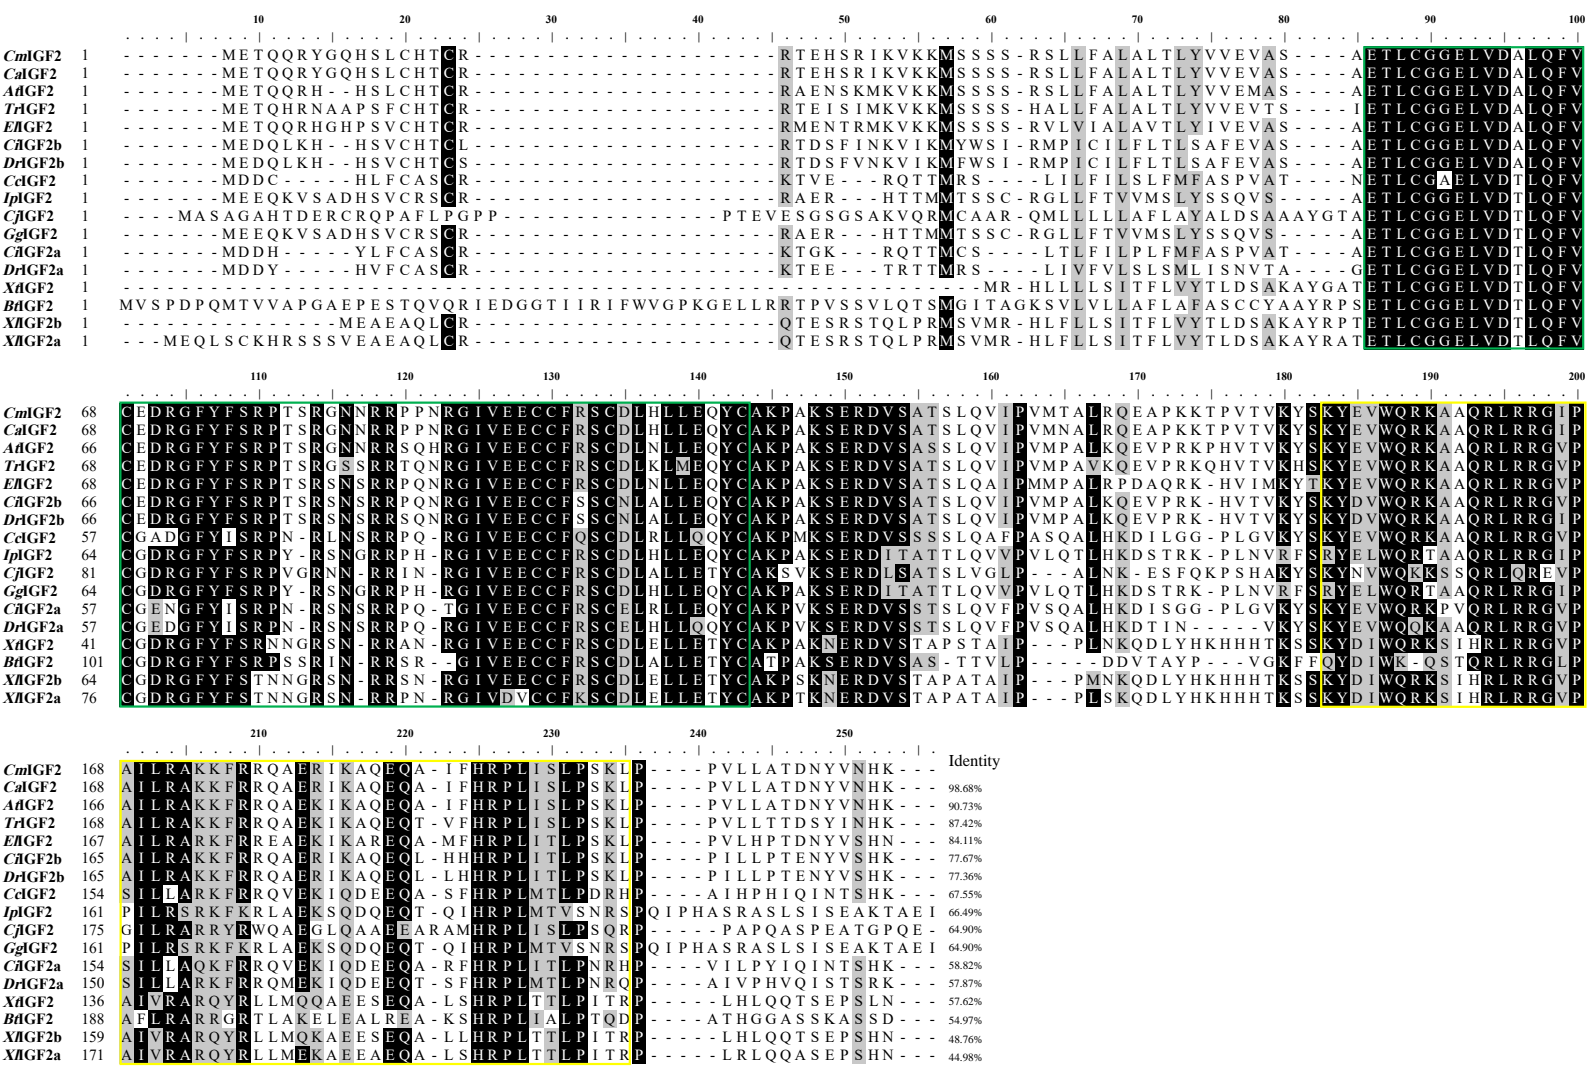

Supplement: s1 [file s1]
